# Supplementary material for: Commissureless acts as a substrate adapter in a conserved Nedd4 E3 ubiquitin ligase pathway to promote axon growth across the midline
Source: eLife journal article supplement (doi:10.7554/elife.92757), 2024-01-03
Supplement: fig7-data4 [file elife-92757-fig7-data4-v1.zip]

4-15 blot 1

Blot 2 4-17

Blot 3 4-18
