# Supplementary material for: Commissureless acts as a substrate adapter in a conserved Nedd4 E3 ubiquitin ligase pathway to promote axon growth across the midline
Source: eLife. 2025 May 23;13:RP92757. doi: 10.7554/eLife.92757 (PMC12101832; doi:10.7554/eLife.92757)
Supplement: Figure 2—source data 5. [file elife-92757-fig2-data5.xlsx]

## Sheet: Sheet1
													lysate protein levels
2022-08-25
	Ub IP	IGG	IGG rel	Robo lys	robo rel	tubulin	tub rel		robo ub	fold
robo	1910.57	30957.5	0.726258	6334.05	0.937212	6388.05	1		2806.95	1
robo WT	25345.6	24754.5	0.580736	2347.91	0.347406	3742.91	0.585924		214410	76.3855
robo LPSY	21320.8	42625.5	0.999989	3846.98	0.569215	3527.62	0.552221		67829.6	24.1649
robo 2PY	8906.11	24310.1	0.570312	6758.42	1	6385.05	0.99953		15623.5	5.56601
robo chq	632.456	19369.8	0.454413	4498.15	0.665565	1723.01	0.269724		7752.99	2.76207
robo WT chq	32894.7	20089.3	0.471293	1818.96	0.269141	3359.33	0.525876		493142	175.686
robo LPSY chq	12586.3	20449.2	0.479736	4119.81	0.609584	1604.31	0.251141		171374	61.0534
robo 2PY chq	4294.23	28758.1	0.674662	3755.86	0.555732	2417.26	0.378402		30267.7	10.7831
2022-08-16
	Ub IP	IGG	IGG rel	Robo lys	robo rel	tubulin	tub rel		robo ub	fold
robo	40318.8	46219.4	1.00001	8726.22	1	6629.64	1		40318.4	1
robo WT	64907.5	19901.6	0.430594	3116.18	0.357106	3338.62	0.50359		838210	20.7898
robo LPSY	43038.4	27424.2	0.593353	8205.84	0.940369	5007.4	0.755305		102123	2.53291
robo 2PY	39451.7	18683.1	0.40423	5270.68	0.604006	2356.67	0.355475		454556	11.2742
robo chq	25279	14486.1	0.313422	6858.48	0.785964	2497.79	0.376761		272371	6.7555
robo WT chq	59347.1	14141.7	0.305972	4845.17	0.555244	694.113	0.104698		3.33653e+06	82.7545
robo LPSY chq	35701.5	20629.5	0.446341	5597.05	0.641407	1848.55	0.278831		447245	11.0928
robo 2PY chq	16658.3	25749.5	0.55712	3993.9	0.457691	2362.08	0.356291		183360	4.54781
2022-10-03	Ub IP	IGG	IGG rel	Robo lys	robo rel	tubulin	tub rel		robo ub	fold
robo	875.477	58313.3	1.00001	8728.46	0.744749	5241.57	0.67867		1732.1	1
robo WT	31178.8	49987.7	0.857231	6251.55	0.533409	5548.69	0.718435		94910.4	54.7949
robo LPSY	15133.9	41007.9	0.703238	12108.4	1.03314	7295.23	0.944574		22052.3	12.7315
robo 2PY	6233.19	40840.7	0.700371	11719.7	0.999972	7723.3	1		8900.09	5.13831
robo chq	1601.91	38629	0.662442	9237.29	0.788165	3724.57	0.482251		6362.1	3.67305
robo WT chq	16141.2	26556.8	0.455418	3092.57	0.263871	5292.57	0.685273		196007	113.161
robo LPSY chq	7949.82	33293.1	0.570938	7191.58	0.613616	5493.4	0.711276		31903.1	18.4187
robo 2PY chq	1181.23	26225.1	0.449731	5470.44	0.466761	6338.1	0.820648		6856.97	3.95875
2022-10-12	Ub IP	IGG	IGG rel	Robo lys	robo rel	tubulin			robo ub	fold
robo	2135.4	35899.9	0.999999	11719.2	1.00002	7527.93	1		2135.36	1
robo WT	43553.2	24986.3	0.695998	3656.05	0.311977	6280.81	0.834334		240409	112.585
robo LPSY	29635.5	18645.5	0.519374	6703.2	0.571994	6242.52	0.829247		120297	56.336
robo 2PY	11847.5	26916.6	0.749766	7309.07	0.623694	5429.4	0.721233		35128.1	16.4507
robo chq	3667	26940.2	0.750425	8942.61	0.763086	3268.91	0.434238		14747	6.9061
robo WT chq	37442.1	17296.9	0.481807	3434.52	0.293073	5109.69	0.678764		390654	182.946
robo LPSY chq	18801.7	15632.3	0.43544	6825.34	0.582416	6101.81	0.810556		91464.3	42.8333
robo 2PY chq	8161.64	20819.4	0.579928	6118.42	0.522094	5148.28	0.68389		39415.7	18.4586
