# Supplementary material for: Commissureless acts as a substrate adapter in a conserved Nedd4 E3 ubiquitin ligase pathway to promote axon growth across the midline
Source: eLife. 2025 May 23;13:RP92757. doi: 10.7554/eLife.92757 (PMC12101832; doi:10.7554/eLife.92757)
Supplement: Figure 2—source data 6. [file elife-92757-fig2-data6.xlsx]

## Sheet: fly
	Robo	Raw #	relative	over tubulin		Comm	raw #	relative	over tubulin		tubulin	fold
	alone	20939.7	2.49754	2.20466							32610.3	1.13285	tub	fold
	comm WT	8384.12	1	0.90091		WT	47535.5	1	0.90091		31952.3	1.10999	31952.3	1.10999
	Comm 1PY	14810.4	1.76648	1.66063		1PY	54643.2	1.14952	1.08064		30621.2	1.06374	30621.2	1.06374
	Comm 2PY	16531.5	1.97176	1.97176		2PY	104856	2.20585	2.20585		28786.2	1	28786.2	1
	Robo	Raw #	relative	over tubulin		Comm	raw #	relative	over tubulin		tubulin	fold
	alone	30697.9	1.91762	1.91762							30721.7	1	tub	fold
	comm WT	16008.4	1	0.902146		WT	17223.4	1	1		34054	1.10847	34054	1
	Comm 1PY	37353.7	2.33339	1.80194		1PY	59557.7	3.45796	2.96003		39782.4	1.29493	39782.4	1.16822
	Comm 2PY	36921.8	2.30641	1.7937		2PY	72951.7	4.23562	3.65135		39503.1	1.28584	39503.1	1.16001
	Robo	Raw #	relative	over tubulin		Comm	raw #	relative	over tubulin		tubulin	fold
	alone	20585.9	1	1							44486.9	1	tub	fold
	comm WT	35818.3	1.73994	1.59169		WT	23343.6	1	1		48630.3	1.09314	48630.3	1
	Comm 1PY	34068.2	1.65493	1.31654		1PY	57871.8	2.47913	2.1559		55921.4	1.25703	55921.4	1.14993
	Comm 2PY	29359.9	1.42621	1.39202		2PY	71644.4	3.06912	3.27454		45579.7	1.02456	45579.7	0.937268

## Sheet: s2R+
2021-07-26	Robo	Raw #	tubulin	tub relative	normalized tub					Comm	raw #	tubulin	tub relative	normalized
	alone	29800	13660.7	1	29799.9
	comm WT	8000.05	11750.4	0.860159	9300.67					WT	28053.7	11750.4	0.952503	29452.6	0.999998
	Comm 1PY	18551.7	11818.9	0.865176	21442.7					1PY	69414.6	11818.9	0.958059	72453.4	2.46
	Comm 2PY	30579	12236.3	0.895731	34138.6					2PY	55397.8	12236.3	0.991895	55850.5	1.89628
2021-07-20	Robo	Raw #	tubulin	tub relative	normalized tub					Comm	raw #	tubulin
	alone	25593.4	10051.2	0.79427	32222.6
	comm WT	10780.2	12202.4	0.964256	11179.9					WT	34939.6	12202.4	0.964256	36234.8	1
	Comm 1PY	18040.5	12351.7	0.976057	18483					1PY	74496.5	12351.7	0.976057	76323.9	2.10637
	Comm 2PY	38678.3	12654.7	1	38678.3					2PY	50633	12654.7	1	50632.9	1.39736
2021-07-13	Robo	Raw #	tubulin	tub relative	normalized tub					Comm	raw #	tubulin
	alone	32373.1	12444.5	0.98937	32720.9
	comm WT	8576.76	12578.2	1	8576.73					WT	24259.8	12578.2	1	24259.7	1
	Comm 1PY	19064.7	10370.4	0.824476	23123.5					1PY	91305.4	10370.4	0.824476	110744	4.56492
	Comm 2PY	35113.9	7268.64	0.577876	60763.7					2PY	50671	7268.64	0.577876	87684.9	3.61443
