# Supplementary material for: Commissureless acts as a substrate adapter in a conserved Nedd4 E3 ubiquitin ligase pathway to promote axon growth across the midline
Source: eLife. 2025 May 23;13:RP92757. doi: 10.7554/eLife.92757 (PMC12101832; doi:10.7554/eLife.92757)
Supplement: Figure 4—source data 1. [file elife-92757-fig4-data1.xlsx]

## Sheet: Sheet1
	WILD TYPE								LPSY
	image	# cells w punctate comm	# cells w surface comm	Total cells	# cells w punctate robo	# cells w surface robo	Total cells		image	# cells w punctate comm	# cells w surface comm	Total cells	# cells w punctate robo	# cells w surface robo	Total cells			chi squares			p value from graphpad fisher's exact test
	1	2	1	3	2	1	3		1	2	4	6	2	4	6			robo wt vs LPSY
	2	4	0	4	4	0	4		2	3	0	3	1	2	3			# punctate	# surface
	3	5	1	6	5	1	6		3	4	0	4	1	3	4		wt	27	3
	4	5	0	5	5	0	5		4	4	1	5	2	3	5		lpsy	9	20		p<0.001
	5	4	0	4	4	0	4		5	3	0	3	1	2	3
	6	3	1	4	3	1	4		6	2	1	3	1	2	3			robo wt vs 2PY
	7	4	0	4	4	0	4		7	4	1	5	1	4	5			# punctate	# surface
		27	3	30	27	3	30			22	7	29	9	20	29		wt	27	3
	%	90	10		90	10			%	75.8621	24.1379		31.0345	68.9655			2py	9	31		p<0.001
	2PY																	comm wt vs LPSY
	image	# cells w punctate comm	# cells w surface comm	Total cells	# cells w punctate robo	# cells w surface robo	Total cells					summary						# punctate	# surface
	1	3	3	6	2	4	6					WT	1PY	2PY			wt	27	3
	2	2	4	6	1	5	6				% surface comm	10	24	55			lpsy	22	7		p=0.18
	3	2	3	5	1	4	5				% surface robo	10	69	77
	4	3	0	3	0	3	3				n	30	29	40				comm wt vs 2py
	5	2	3	5	1	4	5											# punctate	# surface
	6	4	3	7	2	5	7										wt	27	3
	7	2	6	8	2	6	8										2py	18	22		p<0.001
		18	22	40	9	31	40
		45	55		22.5	77.5
