# Supplementary material for: Commissureless acts as a substrate adapter in a conserved Nedd4 E3 ubiquitin ligase pathway to promote axon growth across the midline
Source: eLife. 2025 May 23;13:RP92757. doi: 10.7554/eLife.92757 (PMC12101832; doi:10.7554/eLife.92757)
Supplement: Figure 6—figure supplement 2—source data 1. [file elife-92757-fig6-figsupp2-data1.xlsx]

## Sheet: Sheet1
	fra het										fra homo
	fly #	thin	missing	normal	total	% thin	% missing	% normal	% total defect		fly #	thin	missing	normal	total	% thin	% missing	% normal	% total defect
	1	1	0	15	16	6.25	0	93.75	6.25		1	6	0	10	16	37.5	0	62.5	37.5
	2	0	0	16	16	0	0	100	0		2	7	0	9	16	43.75	0	56.25	43.75
	3	0	0	16	16	0	0	100	0		3	4	2	10	16	25	12.5	62.5	37.5
	4	1	0	15	16	6.25	0	93.75	6.25		4	5	0	11	16	31.25	0	68.75	31.25
	5	0	0	16	16	0	0	100	0		5	6	0	10	16	37.5	0	62.5	37.5
	6	0	0	16	16	0	0	100	0		6	4	0	12	16	25	0	75	25
	7	0	0	16	16	0	0	100	0		7	5	0	11	16	31.25	0	68.75	31.25
	8	0	0	16	16	0	0	100	0		8	5	0	11	16	31.25	0	68.75	31.25
	9	0	0	16	16	0	0	100	0		9	3	1	12	16	18.75	6.25	75	25
	10	0	0	16	16	0	0	100	0		10	6	0	10	16	37.5	0	62.5	37.5
	11	0	0	16	16	0	0	100	0		11	6	0	10	16	37.5	0	62.5	37.5
	12	0	0	16	16	0	0	100	0		12	5	0	11	16	31.25	0	68.75	31.25
	13	0	0	14	14	0	0	100	0		13	3	2	11	16	18.75	12.5	68.75	31.25
	14	0	0	16	16	0	0	100	0		14	5	1	10	16	31.25	6.25	62.5	37.5
	15	0	0	16	16	0	0	100	0		15	5	1	10	16	31.25	6.25	62.5	37.5
	16	0	0	16	16	0	0	100	0		16	4	1	11	16	25	6.25	68.75	31.25
	17	0	0	16	16	0	0	100	0		17	4	0	12	16	25	0	75	25
	18	0	0	16	16	0	0	100	0		total	83	8	181	272	30.5147	2.94118	66.5441	33.4559
	19	0	0	16	16	0	0	100	0
	total	2	0	300	302	0.662252	0	99.3377	0.662252
	smurf homo										smurf fra double
	fly #	thin	missing	normal	total	% thin	% missing	% normal	% total defect		fly #	thin	missing	normal	total	% thin	% missing	% normal	% total defect
	1	1	0	15	16	6.25	0	93.75	6.25		1	6	0	10	16	37.5	0	62.5	37.5
	2	0	0	16	16	0	0	100	0		2	4	2	10	16	25	12.5	62.5	37.5
	3	0	0	14	14	0	0	100	0		3	5	0	11	16	31.25	0	68.75	31.25
	4	0	0	16	16	0	0	100	0		4	5	0	11	16	31.25	0	68.75	31.25
	5	0	0	16	16	0	0	100	0		5	5	0	11	16	31.25	0	68.75	31.25
	6	0	0	16	16	0	0	100	0		6	5	1	10	16	31.25	6.25	62.5	37.5
	7	0	0	16	16	0	0	100	0		7	5	0	11	16	31.25	0	68.75	31.25
	8	0	0	16	16	0	0	100	0		8	7	0	9	16	43.75	0	56.25	43.75
	9	0	0	16	16	0	0	100	0		9	6	0	6	12	50	0	50	50
	10	1	0	15	16	6.25	0	93.75	6.25		10	7	0	9	16	43.75	0	56.25	43.75
	11	1	0	15	16	6.25	0	93.75	6.25		11	6	0	10	16	37.5	0	62.5	37.5
	12	0	0	16	16	0	0	100	0		12	6	1	9	16	37.5	6.25	56.25	43.75
	13	0	0	16	16	0	0	100	0		13	5	0	11	16	31.25	0	68.75	31.25
	14	0	0	14	14	0	0	100	0		14	5	0	11	16	31.25	0	68.75	31.25
	15	0	0	16	16	0	0	100	0		15	4	1	11	16	25	6.25	68.75	31.25
	16	1	0	15	16	6.25	0	93.75	6.25		16	7	1	8	16	43.75	6.25	50	50
	17	2	0	14	16	12.5	0	87.5	12.5		17	5	0	11	16	31.25	0	68.75	31.25
	18	0	0	16	16	0	0	100	0		18	7	0	9	16	43.75	0	56.25	43.75
	19	0	0	16	16	0	0	100	0		19	5	0	11	16	31.25	0	68.75	31.25
	20	1	0	15	16	6.25	0	93.75	6.25		20	5	0	11	16	31.25	0	68.75	31.25
	21	0	0	16	16	0	0	100	0		total	110	6	200	316	34.8101	1.89873	63.2911	36.7089
	total	7	0	325	332	2.10843	0	97.8916	2.10843
