# Supplementary material for: Commissureless acts as a substrate adapter in a conserved Nedd4 E3 ubiquitin ligase pathway to promote axon growth across the midline
Source: eLife. 2025 May 23;13:RP92757. doi: 10.7554/eLife.92757 (PMC12101832; doi:10.7554/eLife.92757)
Supplement: Figure 6—figure supplement 3—source data 1. [file elife-92757-fig6-figsupp3-data1.xlsx]

## Sheet: Sheet1
	fra het	normal	thin	missing	total	% normal	% thin	% missing	% total defect		fra homo	normal	thin	missing	total	% normal	% thin	% missing	% total defect		sudx fra dko	normal	thin	missing	total	% normal	% thin	% missing	% total defect
	1	16	0	0	16	100	0	0	0		1	11	5	0	16	68.75	31.25	0	31.25		1	13	3	0	16	81.25	18.75	0	18.75
	2	15	1	0	16	93.75	6.25	0	6.25		2	10	6	0	16	62.5	37.5	0	37.5		2	13	3	0	16	81.25	18.75	0	18.75
	3	16	0	0	16	100	0	0	0		3	9	3	2	14	64.2857	21.4286	14.2857	35.7143		3	12	2	0	14	85.7143	14.2857	0	14.2857
	4	15	0	0	15	100	0	0	0		4	11	4	1	16	68.75	25	6.25	31.25		4	10	6	0	16	62.5	37.5	0	37.5
	5	16	0	0	16	100	0	0	0		5	11	5	0	16	68.75	31.25	0	31.25		5	12	4	0	16	75	25	0	25
	6	16	0	0	16	100	0	0	0		6	11	4	1	16	68.75	25	6.25	31.25		6	10	5	1	16	62.5	31.25	6.25	37.5
	7	16	0	0	16	100	0	0	0		7	12	4	0	16	75	25	0	25		7	11	5	0	16	68.75	31.25	0	31.25
	8	14	0	0	14	100	0	0	0		8	12	3	1	16	75	18.75	6.25	25		8	12	4	0	16	75	25	0	25
	9	16	0	0	16	100	0	0	0		9	13	3	0	16	81.25	18.75	0	18.75		9	10	5	1	16	62.5	31.25	6.25	37.5
	10	15	1	0	16	93.75	6.25	0	6.25		10	9	3	1	13	69.2308	23.0769	7.69231	30.7692		10	11	5	0	16	68.75	31.25	0	31.25
	11	16	0	0	16	100	0	0	0		11	12	4	0	16	75	25	0	25		11	11	5	0	16	68.75	31.25	0	31.25
	12	16	0	0	16	100	0	0	0		12	11	3	2	16	68.75	18.75	12.5	31.25		12	12	4	0	16	75	25	0	25
	13	16	0	0	16	100	0	0	0		13	12	4	0	16	75	25	0	25		13	11	4	1	16	68.75	25	6.25	31.25
	14	16	0	0	16	100	0	0	0		14	13	2	0	15	86.6667	13.3333	0	13.3333		14	12	3	1	16	75	18.75	6.25	25
	15	14	2	0	16	87.5	12.5	0	12.5		15	11	5	0	16	68.75	31.25	0	31.25		15	10	2	1	13	76.9231	15.3846	7.69231	23.0769
	16	16	0	0	16	100	0	0	0		16	9	4	0	13	69.2308	30.7692	0	30.7692		16	11	4	0	15	73.3333	26.6667	0	26.6667
	17	16	0	0	16	100	0	0	0		17	11	4	1	16	68.75	25	6.25	31.25		17	15	0	1	16	93.75	0	6.25	6.25
	18	15	1	0	16	93.75	6.25	0	6.25		18	11	4	1	16	68.75	25	6.25	31.25		18	14	2	0	16	87.5	12.5	0	12.5
	19	16	0	0	16	100	0	0	0		19	12	3	1	16	75	18.75	6.25	25		19	10	2	1	13	76.9231	15.3846	7.69231	23.0769
	20	14	0	0	14	100	0	0	0		20	8	4	0	12	66.6667	33.3333	0	33.3333		20	13	3	0	16	81.25	18.75	0	18.75
	total	310	5	0	315	98.4127	1.5873	0	1.5873		total	219	77	11	307	71.3355	25.0814	3.58306	28.6645		21	10	5	1	16	62.5	31.25	6.25	37.5
																					total	243	76	8	327	74.3119	23.2416	2.44648	25.6881
	sudx mutant
		normal	thin	missing	total	% normal	% thin	% missing	% total defect
	1	15	1	0	16	93.75	6.25	0	6.25
	2	16	0	0	16	100	0	0	0
	3	16	0	0	16	100	0	0	0
	4	16	0	0	16	100	0	0	0
	5	16	0	0	16	100	0	0	0
	6	14	2	0	16	87.5	12.5	0	12.5
	7	16	0	0	16	100	0	0	0
	8	16	0	0	16	100	0	0	0
	9	14	2	0	16	87.5	12.5	0	12.5
	10	16	0	0	16	100	0	0	0
	11	16	0	0	16	100	0	0	0
	12	14	2	0	16	87.5	12.5	0	12.5
	13	15	0	0	15	100	0	0	0
	14	12	4	0	16	75	25	0	25
	15	13	3	0	16	81.25	18.75	0	18.75
	16	16	0	0	16	100	0	0	0
	17	16	0	0	16	100	0	0	0
	18	16	0	0	16	100	0	0	0
	19	16	0	0	16	100	0	0	0
	20	16	0	0	16	100	0	0	0
	21	16	0	0	16	100	0	0	0
	22	16	0	0	16	100	0	0	0
						96.0227	3.97727
