# Supplementary material for: Commissureless acts as a substrate adapter in a conserved Nedd4 E3 ubiquitin ligase pathway to promote axon growth across the midline
Source: eLife. 2025 May 23;13:RP92757. doi: 10.7554/eLife.92757 (PMC12101832; doi:10.7554/eLife.92757)
Supplement: Figure 6—source data 1. [file elife-92757-fig6-data1.xlsx]

## Sheet: Sheet1
	fra het
	fly #	thin	missing	normal	total	% thin	% missing	% normal	% total defect		Nedd4 homo
	1	0	0	16	16	0	0	100	0		fly #	thin	missing	normal	total	% thin	% missing	% normal	% total defects
	2	0	0	16	16	0	0	100	0		1	0	0	16	16	0	0	100	0
	3	0	0	16	16	0	0	100	0		2	0	0	16	16	0	0	100	0
	4	0	0	16	16	0	0	100	0		3	0	0	16	16	0	0	100	0
	5	0	0	16	16	0	0	100	0		4	0	0	16	16	0	0	100	0
	6	0	0	16	16	0	0	100	0		5	0	0	16	16	0	0	100	0
	7	0	0	16	16	0	0	100	0		6	1	0	15	16	6.25	0	93.75	6.25
	8	1	0	15	16	6.25	0	93.75	6.25		7	0	0	16	16	0	0	100	0
	9	0	0	16	16	0	0	100	0		8	0	0	16	16	0	0	100	0
	10	0	0	16	16	0	0	100	0		9	0	0	16	16	0	0	100	0
	11	0	0	16	16	0	0	100	0		10	0	0	16	16	0	0	100	0
	12	1	0	15	16	6.25	0	93.75	6.25		11	0	0	16	16	0	0	100	0
	13	0	0	16	16	0	0	100	0		12	0	0	16	16	0	0	100	0
	14	1	0	15	16	6.25	0	93.75	6.25		13	0	0	16	16	0	0	100	0
	15	0	0	16	16	0	0	100	0		14	0	0	16	16	0	0	100	0
	16	0	0	16	16	0	0	100	0		15	0	0	16	16	0	0	100	0
	17	0	0	16	16	0	0	100	0		16	0	0	16	16	0	0	100	0
	18	0	0	16	16	0	0	100	0		17	0	0	16	16	0	0	100	0
	19	0	0	16	16	0	0	100	0		18	0	0	16	16	0	0	100	0
	20	0	0	16	16	0	0	100	0		19	0	0	16	16	0	0	100	0
	21	0	0	16	16	0	0	100	0		20	0	0	16	16	0	0	100	0
	22	0	0	16	16	0	0	100	0		total	1	0	319	320	0.3125	0	99.6875	0.3125
	total	3	0	349	352	0.852273	0	99.1477	0.852273
	fra homo										fra homo nedd4 het
	fly #	thin	missing	normal	total	% thin	% missing	% normal	% total defects		fly #	thin	missing	normal	total	% thin	% missing	% normal	total defects
	1	4	0	12	16	25	0	75	25		1	4	1	11	16	25	6.25	68.75	31.25
	2	5	0	11	16	31.25	0	68.75	31.25		2	4	1	11	16	25	6.25	68.75	31.25
	3	5	2	9	16	31.25	12.5	56.25	43.75		3	4	0	9	13	30.7692	0	69.2308	30.7692
	4	6	1	9	16	37.5	6.25	56.25	43.75		4	5	1	10	16	31.25	6.25	62.5	37.5
	5	6	1	9	16	37.5	6.25	56.25	43.75		5	5	0	9	14	35.7143	0	64.2857	35.7143
	6	5	0	11	16	31.25	0	68.75	31.25		6	5	0	11	16	31.25	0	68.75	31.25
	7	5	0	11	16	31.25	0	68.75	31.25		7	5	2	9	16	31.25	12.5	56.25	43.75
	8	6	0	10	16	37.5	0	62.5	37.5		8	7	0	8	15	46.6667	0	53.3333	46.6667
	9	7	0	9	16	43.75	0	56.25	43.75		9	4	0	12	16	25	0	75	25
	10	3	0	10	13	23.0769	0	76.9231	23.0769		10	4	0	12	16	25	0	75	25
	11	5	2	9	16	31.25	12.5	56.25	43.75		11	3	1	12	16	18.75	6.25	75	25
	12	4	0	12	16	25	0	75	25		12	4	0	12	16	25	0	75	25
	13	2	0	14	16	12.5	0	87.5	12.5		13	2	0	14	16	12.5	0	87.5	12.5
	14	5	0	11	16	31.25	0	68.75	31.25		14	4	2	10	16	25	12.5	62.5	37.5
	15	4	0	12	16	25	0	75	25		15	4	1	11	16	25	6.25	68.75	31.25
	16	3	0	10	13	23.0769	0	76.9231	23.0769		16	4	0	12	16	25	0	75	25
	17	6	0	10	16	37.5	0	62.5	37.5		17	4	0	12	16	25	0	75	25
	18	3	0	13	16	18.75	0	81.25	18.75		18	2	0	14	16	12.5	0	87.5	12.5
	19	3	0	13	16	18.75	0	81.25	18.75		19	5	0	11	16	31.25	0	68.75	31.25
	20	6	0	10	16	37.5	0	62.5	37.5		20	6	0	10	16	37.5	0	62.5	37.5
	21	5	0	11	16	31.25	0	68.75	31.25			85	9	220	314	27.0701	2.86624	70.0637	29.9363
	22	4	1	11	16	25	6.25	68.75	31.25
	23	3	2	11	16	18.75	12.5	68.75	31.25
	24	2	0	14	16	12.5	0	87.5	12.5
	25	1	0	15	16	6.25	0	93.75	6.25
		108	9	277	394	27.4112	2.28426	70.3046
	double mut
	fly #	thin	missing	normal	total	% thin	% missing	% normal	total defects
	1	3	13	0	16	18.75	81.25	0	100
	2	7	8	1	16	43.75	50	6.25	93.75
	3	3	12	1	16	18.75	75	6.25	93.75
	4	5	11	0	16	31.25	68.75	0	100
	5	5	11	0	16	31.25	68.75	0	100
	6	7	8	1	16	43.75	50	6.25	93.75
	7	1	15	0	16	6.25	93.75	0	100
	8	5	10	1	16	31.25	62.5	6.25	93.75
		36	88	4	128	28.125	68.75	3.125	96.875
