# Supplementary material for: Commissureless acts as a substrate adapter in a conserved Nedd4 E3 ubiquitin ligase pathway to promote axon growth across the midline
Source: eLife. 2025 May 23;13:RP92757. doi: 10.7554/eLife.92757 (PMC12101832; doi:10.7554/eLife.92757)
Supplement: Figure 7—figure supplement 2—source data 1. [file elife-92757-fig7-figsupp2-data1.xlsx]

## Sheet: Sheet1
Control WT
	fly
body segment	1	2	3	4	5	6	7	8	9	10	11	12	13	14	15	16	17	18	19	20
1	32.01	34.16	34.58	32.33	31.21	31.07	32.73	26.89	36.17	32.74	34.15	30.82	31.65	34.19	31.86	26.68	32.02	34.06	30.37	30.06
2	33.47	35.42	33.18	31.65	32.32	32.8	33.02	30.78	37.16	32.41	34.81	32.14	32.55	34.25	31.65	30.66	33.41	33.52	32.8	28.94
3	34.19	37.14	33.6	31.37	33.07	33.08	33.32	28.33	33.71	32.43	34.86	32.59	32.68	32.68	31.65	30.48	32.41	34.97	33.13	30.6
4	35.01	35.49	32.18	32.71	34.8	33.5	31.39	28.89	36.36	33.84	35.58	34.13	33.93	30.7	32.38	34.25	34.36	32.17	33.97	33.93
5	35.26	37.6	31.16	31.07	33.06	33.8	32.11	30.28	32.63	33.47	34.52	32.83	32.03	32.11	34.33	34.94	33.82	31.41	29.05	33.86
6	33.11	35.23	32.84	28.1	32.72	31.39	32.14	28.89	32.63	33.41	34.19	34.89	31.68	32.02	34.01	35.74	34.8	32.86	31.04	34
7	34.15	35.15	30.37	31.81	30.29	32.37	33.82	29.97	34.2	31.74	33.8	35.26	33.06	33.11	34.5	35.18	34.13	30.62	30.28	32.71
8	34.81	34.97	32.01	34.12	32.72	31.33	32.86	29.65	33.54	32.8	36.17		32.8	32.37	35.9	34.13	34.52	30.29	32.24	33.24
AVG nerve cord width	34.0012	35.645	32.49	31.645	32.5237	32.4175	32.6737	29.21	34.55	32.855	34.76	33.2371	32.5475	32.6788	33.285	32.7575	33.6837	32.4875	31.61	32.1675
comm
	fly
body segment	1	2	3	4	5	6	7	8	9	10	11	12	13	14	15	16	17
1	26.21	27.88	24.8	27.52	25.44	29.14	24.54	24.52	27.5	27.22	27.37	26.55	26.8	27.5	26.69	25.81	26.12
2	26.25	28.89	27.5	29.79	26.45	28.8	27.87	25.75	25.75	26.12	26.56	28.33	29.23	26.51	26.28	27.49	26.56
3	26.63	28.38	28.54	27.26	27.53	28.21	26.16	24.03	27.5	27.84	27.87	26.43	27.89	27.86	27.76	26.14	28.61
4	26.21	30.39	29.94	28.36	24.72	27.81	24.5	28.36	27.87	28.27	29.24	25.46	28.33	27.32	26.91	28.19	28.57
5	25.87	26.19	31.33	28.95	27.71	27.98	28.33	27.84	27.49	31.32	29.58	25.21	27.25	29.33	30.82	27.8	26.16
6	28.29	27.74	27.98	28.41	25.53	21.75	27.58	26.72	26.12	29.58	27.85	24.91	29.63	28.94	28.73	26.82	28.99
7	27.95	28.84	29.47	30.06	29.07	25.59	31.01	25.77	26.11	28.2	26.8	24.32	30.61	29.31	30.56	27.24	27.98
8	27.55	31.13	28.8	25.97		26.84	20.22	26.29	27.15	27.86	29.59		28.33	31.6	28.67	28.61	27.81
AVG nerve cord width	26.87	28.68	28.545	28.29	26.6357	27.015	26.2762	26.16	26.9363	28.3013	28.1075	25.8871	28.5087	28.5462	28.3025	27.2625	27.6
comm+nedd4
	fly
body segment	1	2	3	4	5	6	7	8	9	10	11	12	13	14	15	16	17
1	22.62	27.22	25.25	20.2	29.23	22.96	28.99	27.92	23.82	24.42	30.28	20.2	25.79	28.29	24.83	25.94	28.33
2	19.41	28.29	25.41	23.03	26.46	26.76	26.98	26.47	21.94	26.88	27.71	22.34	29.23	30.03	23.63	31.76	33.84
3	19.84	27.55	21.94	23.87	28.57	26.77	28.96	24.36	23.79	23.32	26.51	25.43	27.14	28.22	23.53	27.81	30.81
4	22.13	28.54	20.91	22.15	28.45	22.81	25.46	23.32	22.72	22.98	27.67	21.57	28.36	27.25	22.6	27.22	26.2
5	20.95	25.75	20.98	24.37	31.44	26.97	26.1	28.64	24.43	26.1	30.97	20.68	30.4	29.02	22.02	28.19	28.5
6	22.2	27.5	22.4	23.69	30.66	23.46	26.48	27.5	19.22	25.06	30.66	25.59	29.28	28.27	22.62	26.46	27.58
7	19.85	26.47	22.34	20.08	32.17	29.05	26.82	26.59	24.01	25.81	33.44	22.84	29.65	29.28	22.69	27.55	24.78
8	23.34	28.79	24.61	23.44	29.98	28.7	27.14	28.75	28.54	28.59	32.37		30.28	29.64	26.56	30.28	29.83
AVG nerve cord width	21.2925	27.5137	22.98	22.6037	29.62	25.935	27.1163	26.6937	23.5587	25.395	29.9512	22.6643	28.7662	28.75	23.56	28.1513	28.7338
