# Supplementary material for: Commissureless acts as a substrate adapter in a conserved Nedd4 E3 ubiquitin ligase pathway to promote axon growth across the midline
Source: eLife. 2025 May 23;13:RP92757. doi: 10.7554/eLife.92757 (PMC12101832; doi:10.7554/eLife.92757)
Supplement: Figure 7—figure supplement 2—source data 2. [file elife-92757-fig7-figsupp2-data2.xlsx]

## Sheet: Segments with holes
	CTRL						Comm						Comm+N4
	fly #	segments with holes	segmentts with missing holes	total segments	% seg missing holes		fly #	segments with holes	segmentts with missing holes	total segments	% seg missing holes		fly #	segments with holes	segmentts with missing holes	total segments	% seg missing holes
	1	5	0	5	0		1	6	2	8	25		1	0	7	7	100
	2	5	0	5	0		2	7	0	7	0		2	5	3	8	37.5
	3	5	0	5	0		3	5	2	7	28.5714		3	2	6	8	75
	4	7	0	7	0		4	7	1	8	12.5		4	0	7	7	100
	5	8	0	8	0		5	7	0	7	0		5	7	0	7	0
	6	4	0	4	0		6	7	0	7	0		6	7	0	7	0
	7	6	0	6	0		7	4	3	7	42.8571		7	6	1	7	14.2857
	8	4	0	4	0		8	7	1	8	12.5		8	7	0	7	0
	9	6	0	6	0		9	7	0	7	0		9	0	7	7	100
	10	5	0	5	0		10	6	2	8	25		10	0	7	7	100
	11	5	0	5	0		11	9	0	9	0		11	7	1	8	12.5
	12	6	0	6	0		12	5	1	6	16.6667		12	0	7	7	100
	13	6	0	6	0		13	6	0	6	0		13	8	0	8	0
	14	6	0	6	0		14	6	2	8	25		14	7	0	7	0
	15	7	0	7	0		15	7	1	8	12.5		15	0	7	7	100
	16	3	0	3	0		16	7	1	8	12.5		16	7	1	8	12.5
	17	5	0	5	0		17	9	0	9	0		17	7	0	7	0
	18	5	0	5	0
	19	8	0	8	0
	20	6	0	6	0
					nerve cord classes
					class 1	no collapses
					class 2	less than 50% collapsed
					class 3	more than 50% collapsed
					class 4	all collapsed

## Sheet: hole area
				CTRL	mean hole area		Comm	mean hole area		Comm+N4	mean hole area
				fly #			fly #			fly #
				1			1			1
				2			2			2
				3			3			3
				4			4			4
				5			5			5
				6			6			6
				7			7			7
				8			8			8
				9			9			9
				10			10			10
				11			11			11
				12			12			12
				13			13			13
				14			14			14
				15			15			15
				16			16			16
				17			17			17
				18			18			18
				19			19			19
				20			20			20
