# Supplementary figures and images for: Commissureless acts as a substrate adapter in a conserved Nedd4 E3 ubiquitin ligase pathway to promote axon growth across the midline
Source: eLife journal article supplement (doi:10.7554/elife.92757), 2024-01-03

Western blot 1, Jul 13

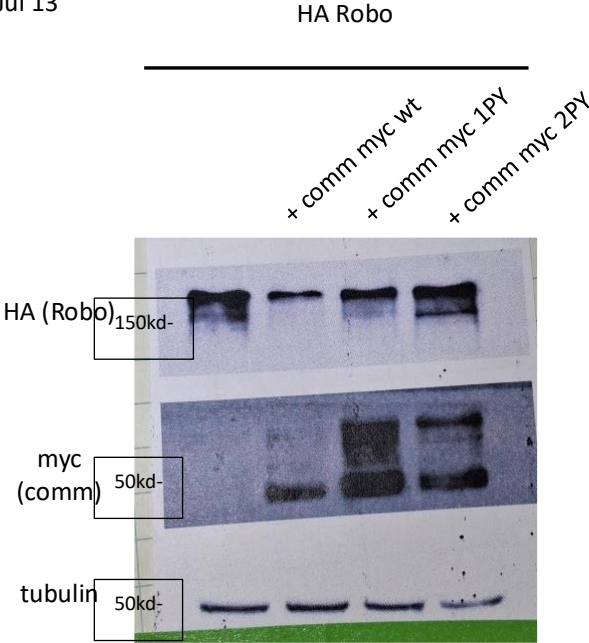

Jul 20 Western blot 2

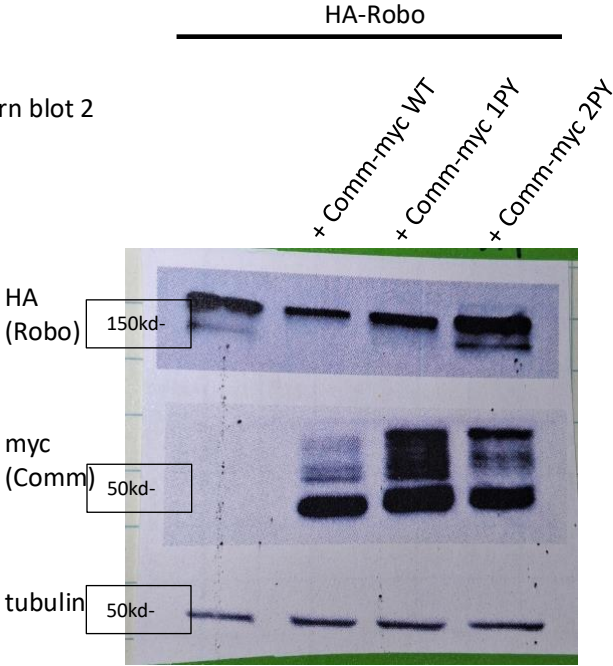

Jul 26 Western blot 3

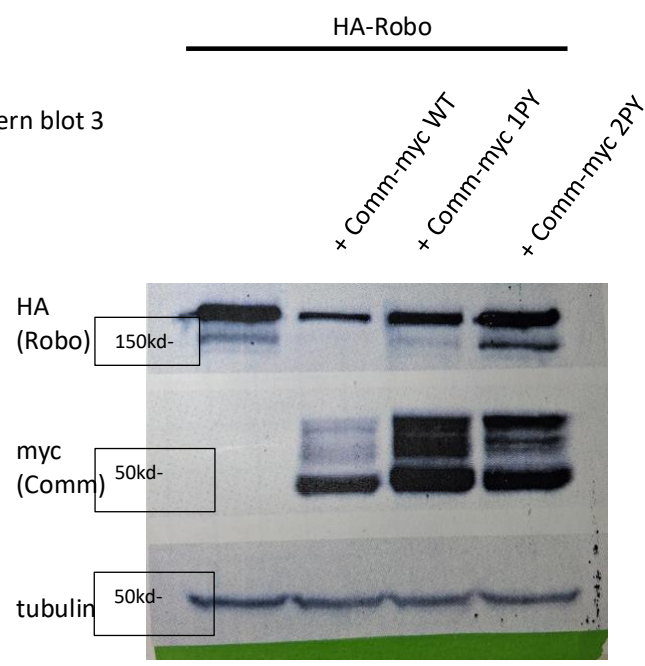

Supplement: fig2-data2 [file Fig 2 A-C Robo levels western blot.pdf › Fig 2 A-C source data 2/Fig 2 A-C Robo levels western blot.pdf]

8-16 IP 1

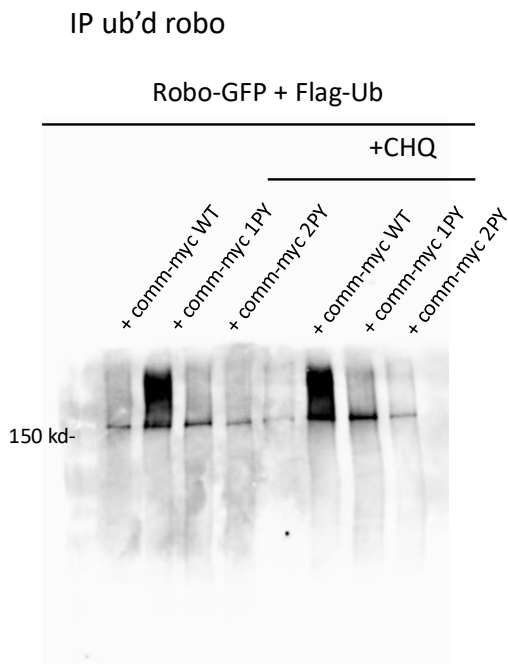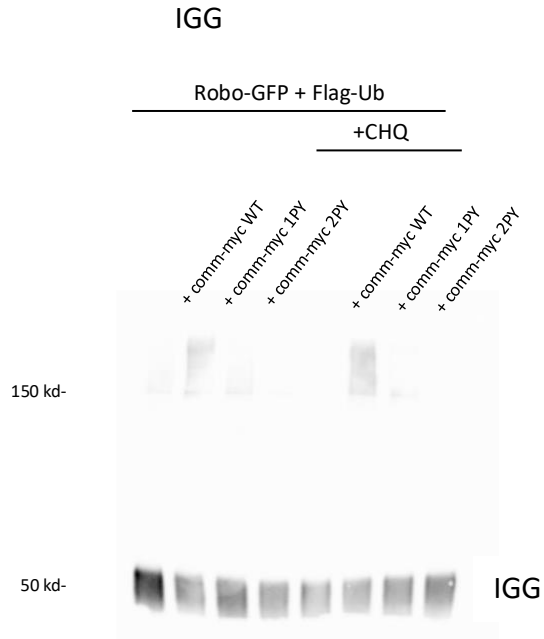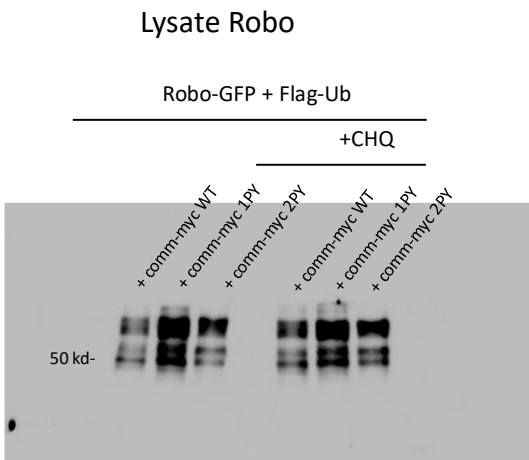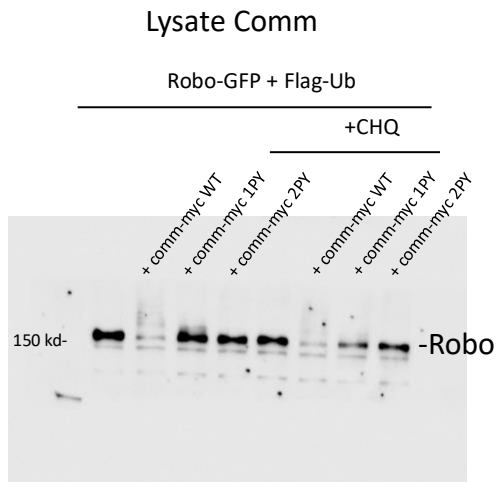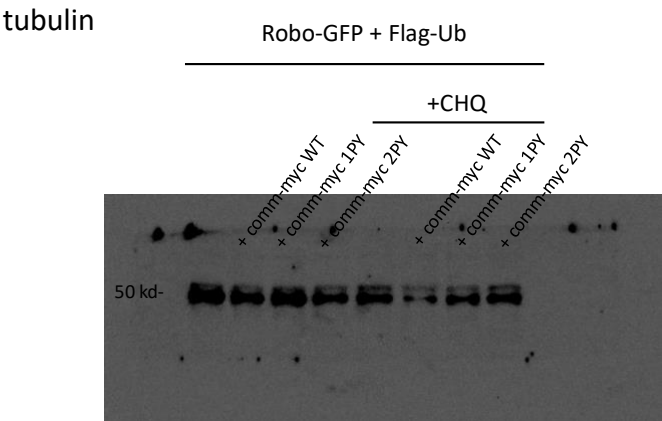

8-25 IP 2

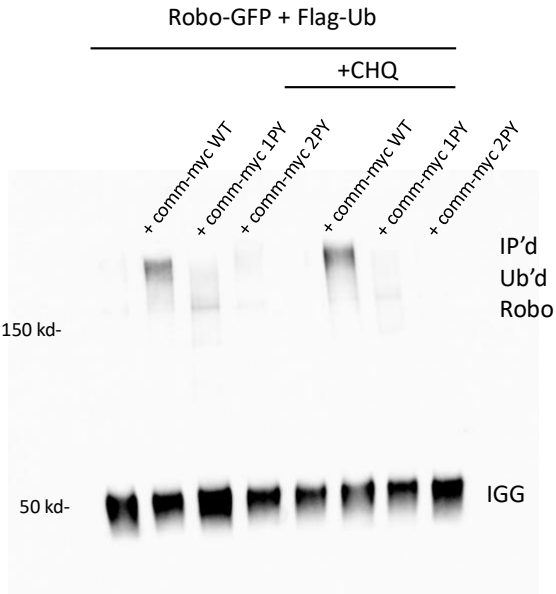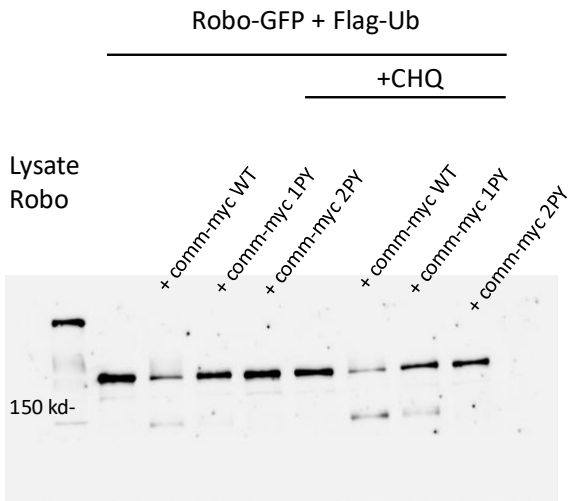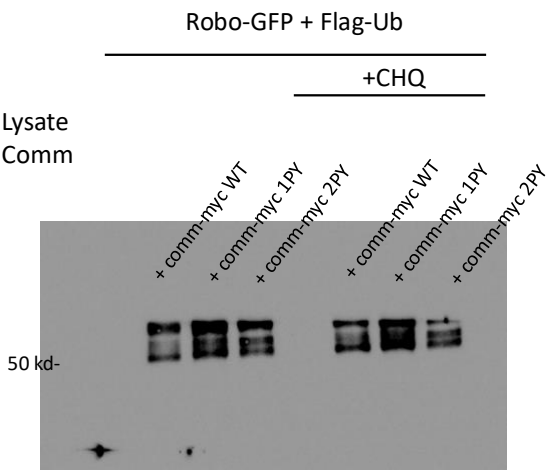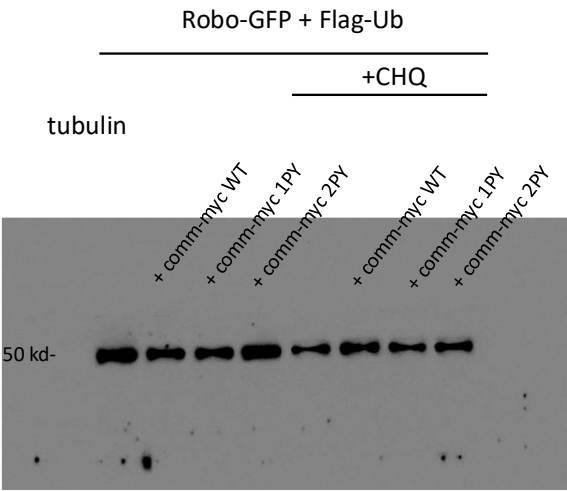

10-3 IP 3

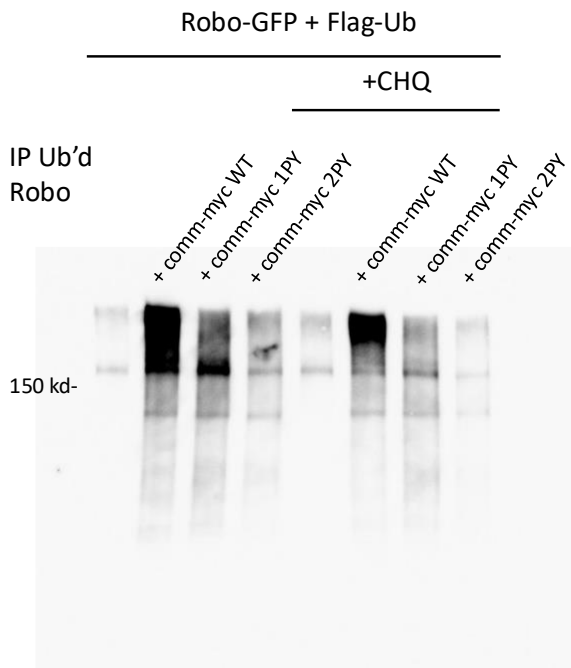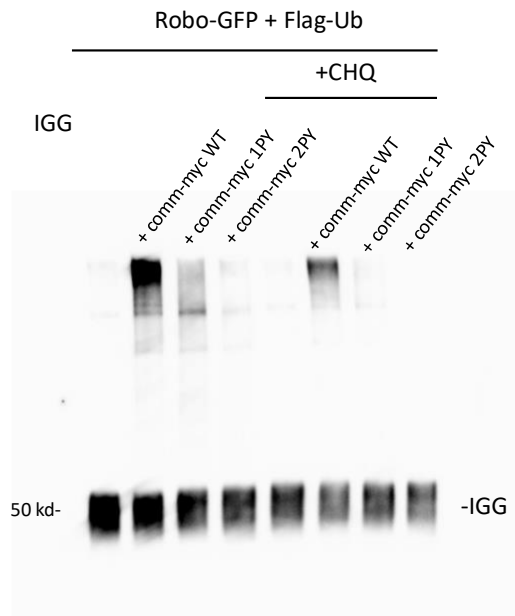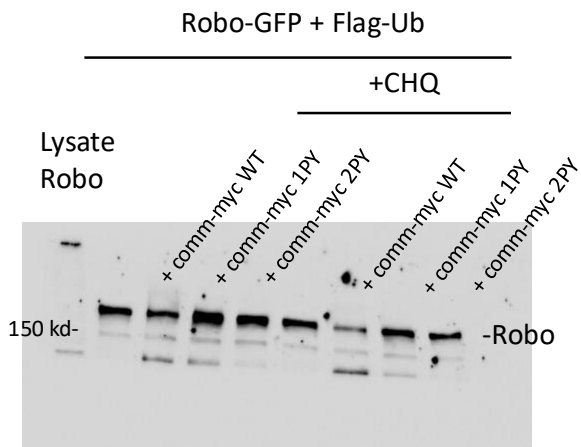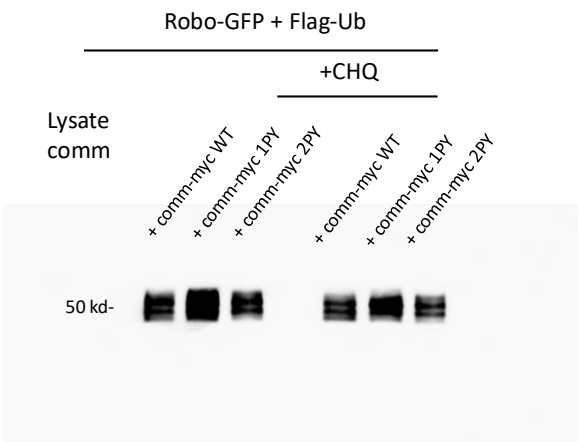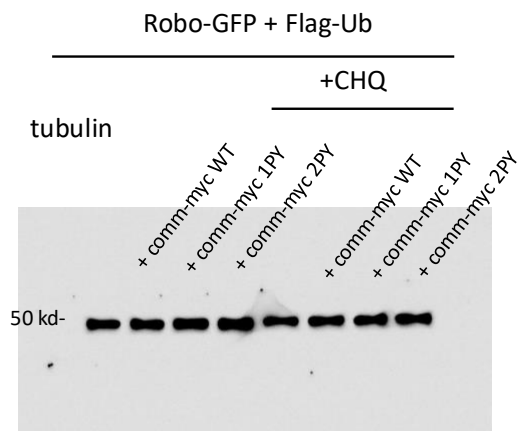

10-12 IP 4

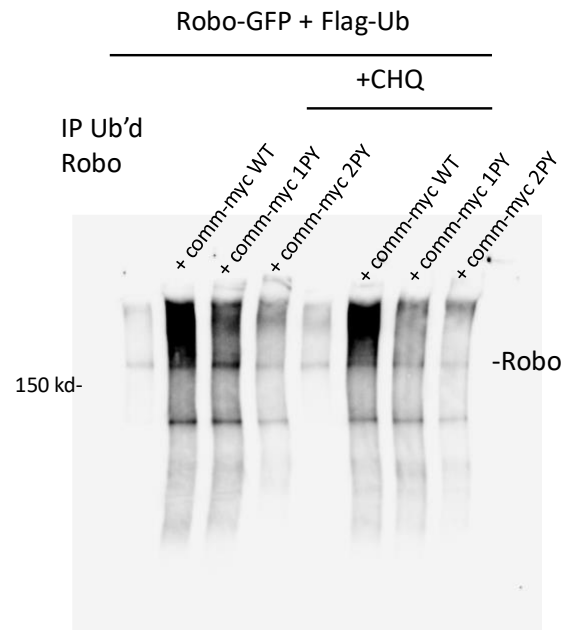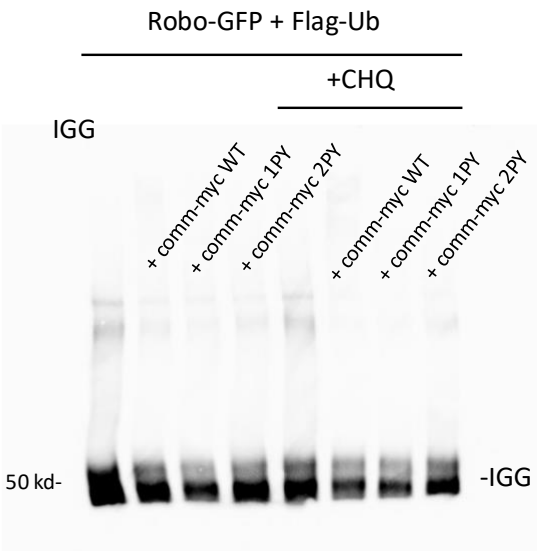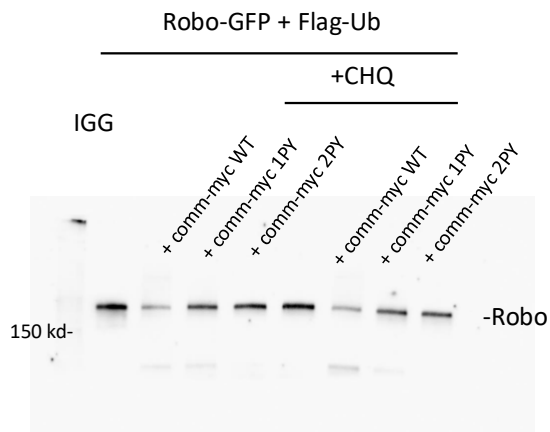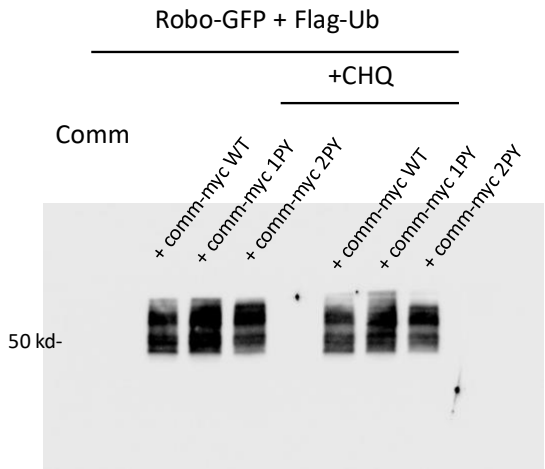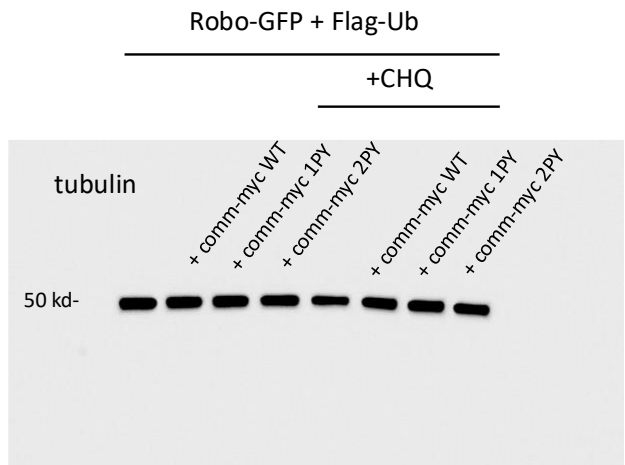

Supplement: fig2-data4 [file elife-92757-fig2-data4-v1.zip]

Oct 20 IP 1

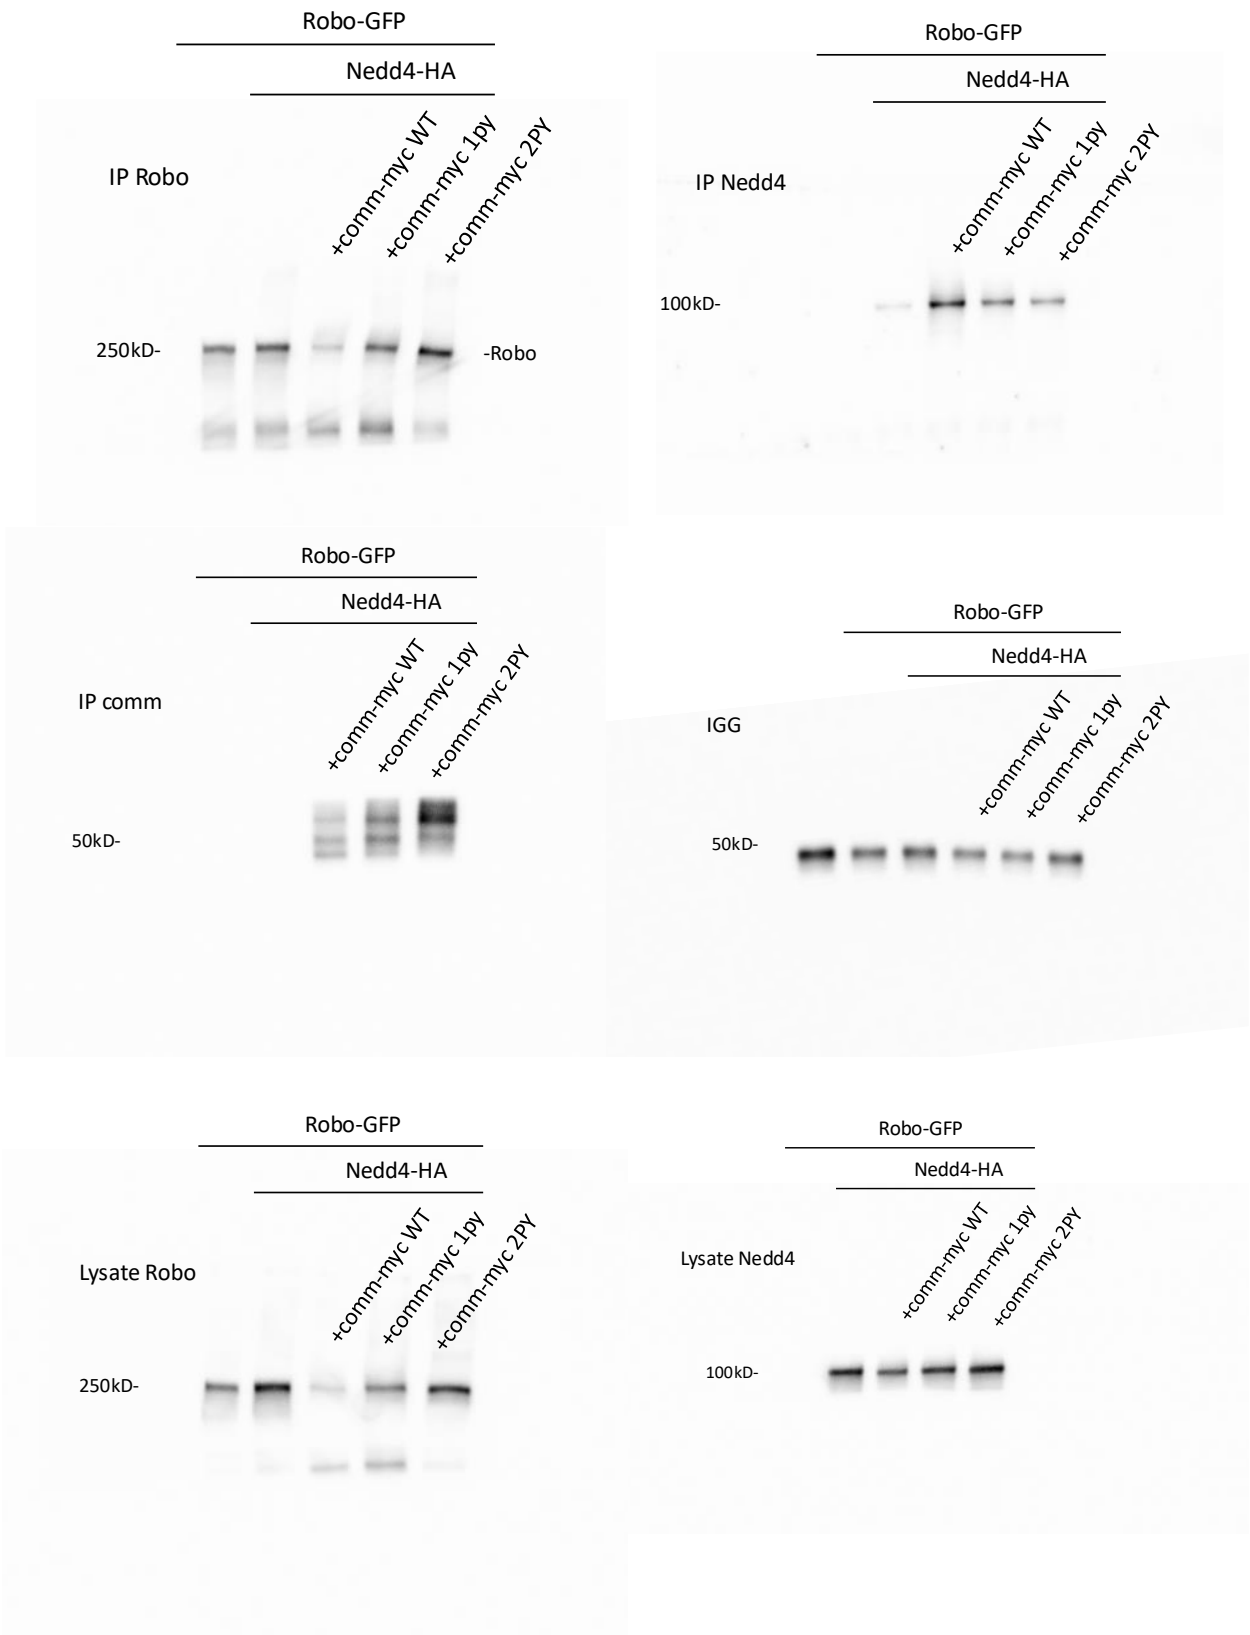

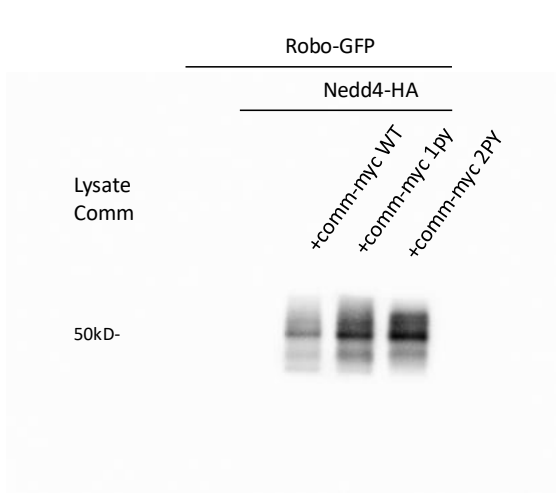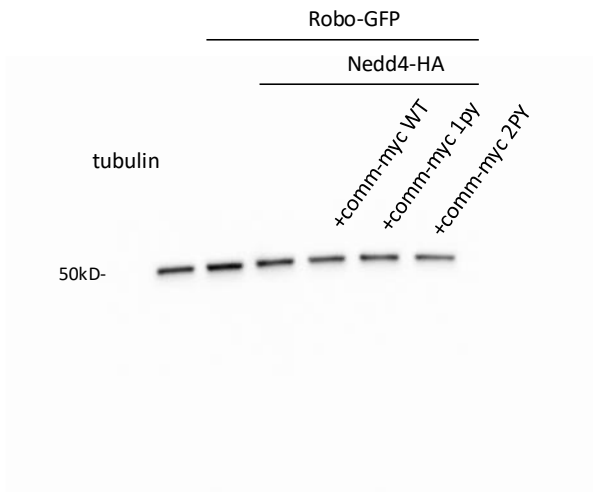

March 9 IP 2

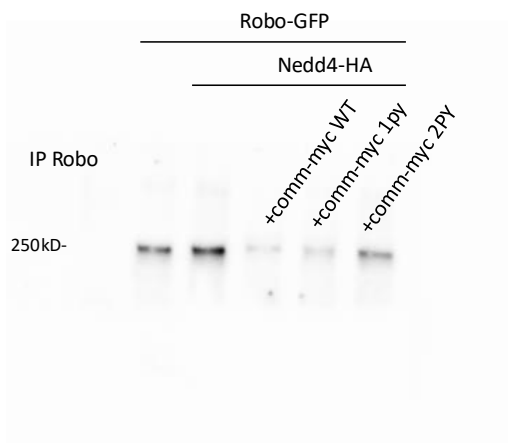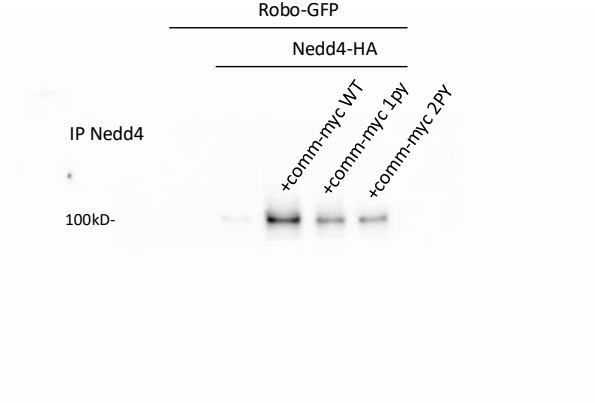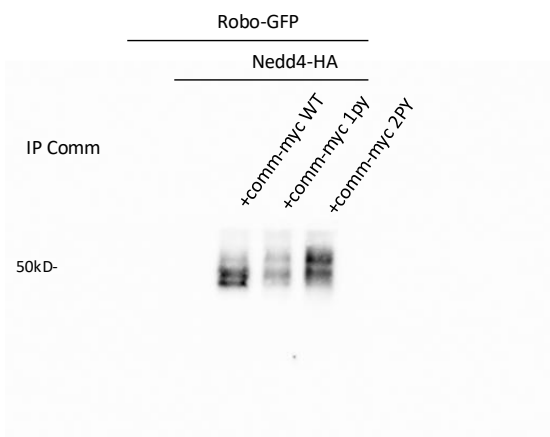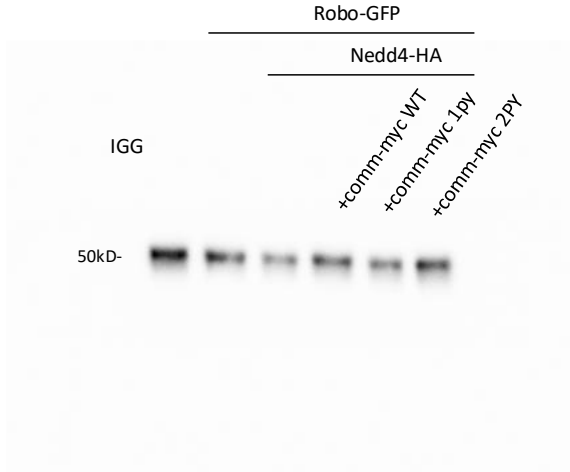

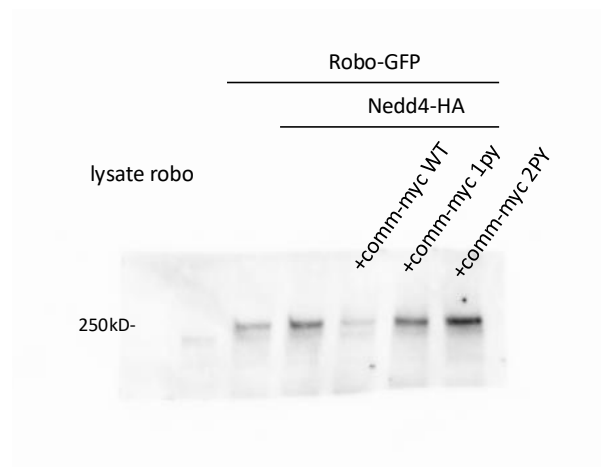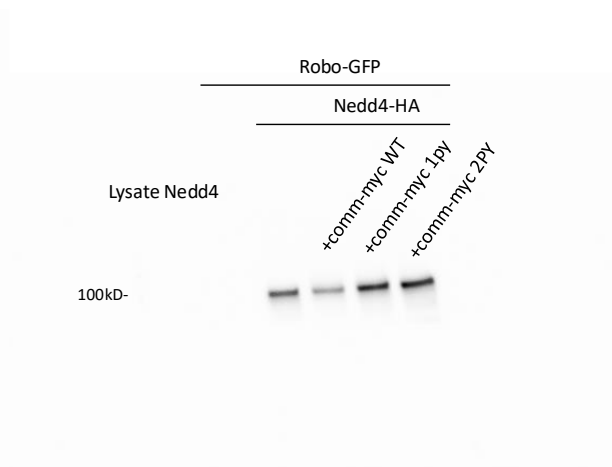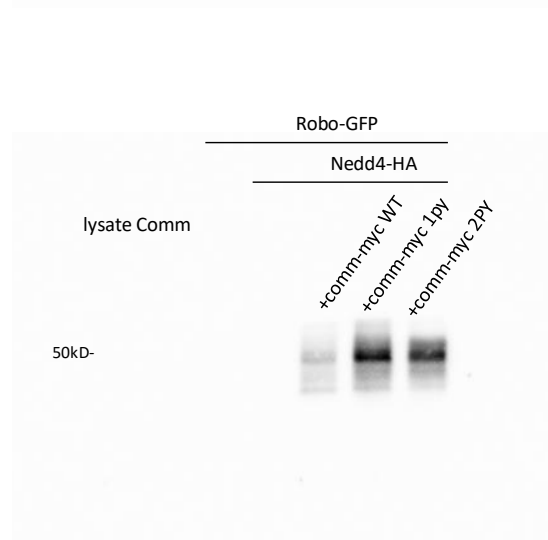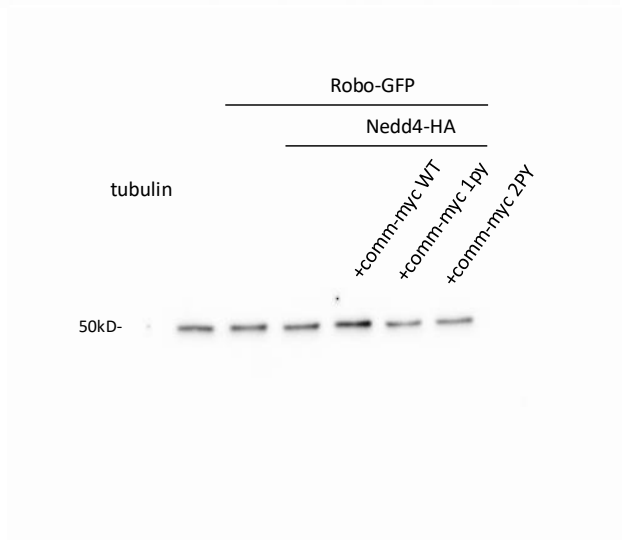

Jun 8 IP 3

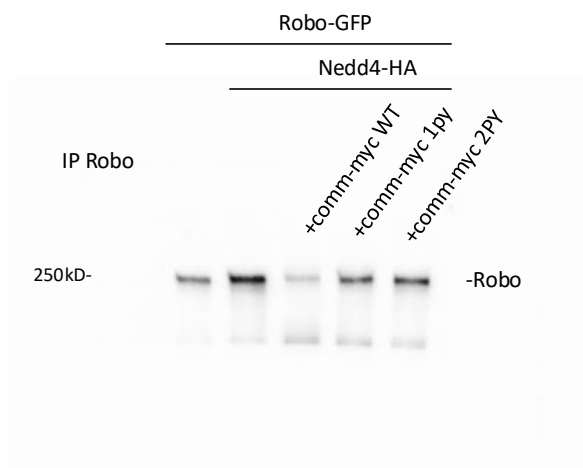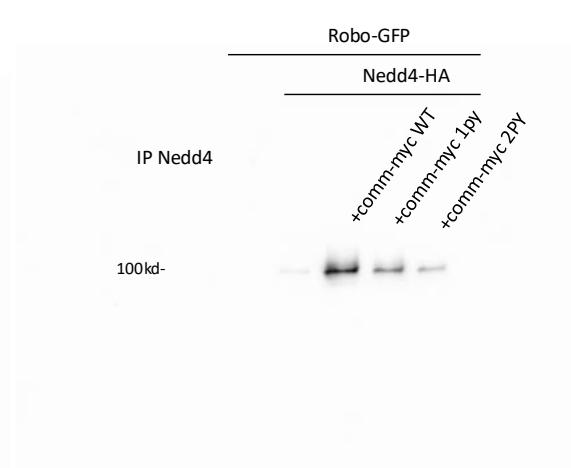

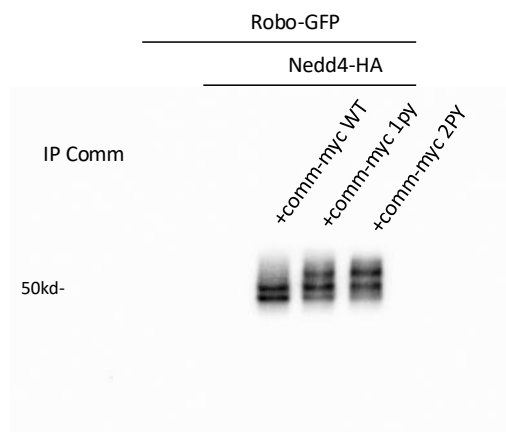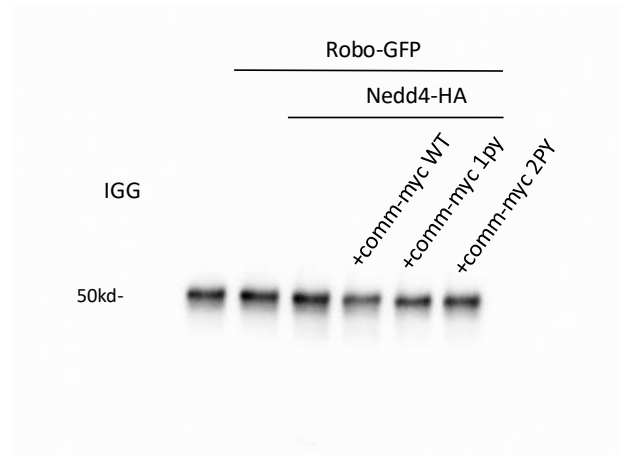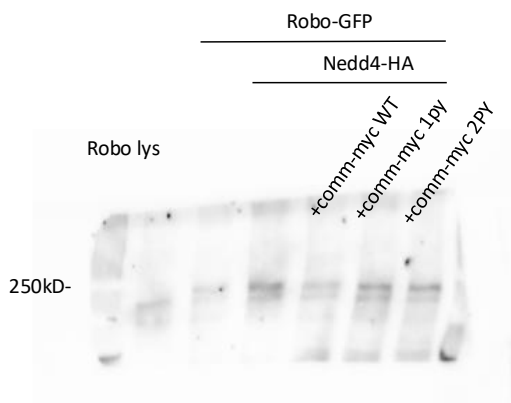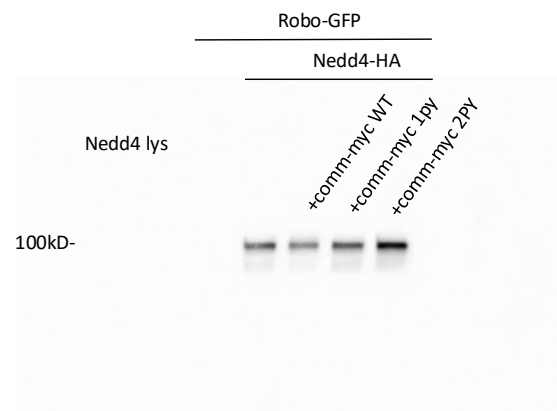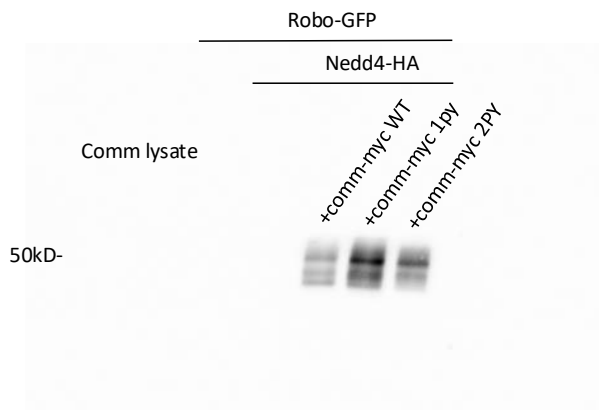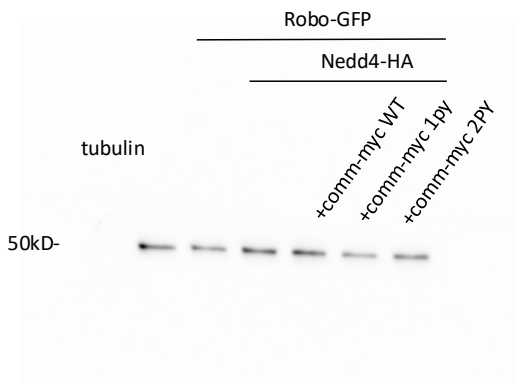

Supplement: fig7-data2 [file elife-92757-fig7-data2-v1.zip]
